1 **Bulk Segregant Approaches to Nutritional Genomics in *Plasmodium falciparum***

2 *Short title: BSA and Malaria Parasite Nutritional Genomics*

3 Sudhir Kumar<sup>1†</sup>, Xue Li<sup>2†</sup>, Marina McDew-White<sup>2</sup>, Ann Reyes<sup>2</sup>, Abeer Sayeed<sup>2</sup>, Meseret T.  
4 Haile<sup>1</sup>, Spencer Y. Kennedy<sup>1</sup>, Nelly Camargo<sup>1</sup>, Lisa A. Checkley<sup>3</sup>, Katelyn M. Vendrely<sup>3</sup>, Katrina  
5 A. Button-Simons<sup>3</sup>, Ian H. Cheeseman<sup>4</sup>, Stefan H. Kappe<sup>1,5</sup>, François Nosten<sup>6,7</sup>, Michael T.  
6 Ferdig<sup>3</sup>, Ashley M. Vaughan<sup>1,5\*</sup> and Tim J. C. Anderson<sup>2\*</sup>

7 <sup>1</sup> Center for Global Infectious Disease Research, Seattle Children's Research Institute, Seattle,  
8 Washington, USA.

9 <sup>2</sup> Program in Disease Intervention and Prevention, Texas Biomedical Research Institute, San  
10 Antonio, Texas, USA.

11 <sup>3</sup> Eck Institute for Global Health, Department of Biological Sciences, University of Notre Dame,  
12 Notre Dame, Indiana, USA.

13 <sup>4</sup> Program in Host Pathogen Interactions, Texas Biomedical Research Institute, San Antonio,  
14 Texas, USA.

15 <sup>5</sup> Department of Global Health, University of Washington, Seattle, Washington, USA.

16 <sup>6</sup> Shoklo Malaria Research Unit, Mahidol-Oxford Tropical Medicine Research Unit, Faculty of  
17 Tropical Medicine, Mahidol University, Mae Sot, Thailand.

18 <sup>7</sup> Centre for Tropical Medicine and Global Health, Nuffield Department of Medicine Research  
19 building, University of Oxford Old Road campus, Oxford, UK.

20

21 † Sudhir Kumar and Xue Li contributed equally to this work.

22 \*Co-corresponding authors: [ashley.vaughan@seattlechildrens.org](mailto:ashley.vaughan@seattlechildrens.org) (AMV) and  
23 [tanderso@TxBiomed.org](mailto:tanderso@TxBiomed.org) (TJCA).

24

25 **Abstract**

26 Nutrient acquisition/metabolism pathways provide potent targets for drug design. We conducted  
27 crosses between African (NF54) and Asian (NHP4026) malaria parasites, and compared genome-  
28 wide allele frequency changes in independent progeny populations grown in human serum or  
29 AlbuMAX, a commercial bovine serum formulation. We detected three QTLs linked with  
30 differential growth that contained strong candidate genes: aspartate transaminase *AST*  
31 (*chromosome 2*), cysteine protease *ATG4* (*chr. 13*) and *EBA-140* (*chr. 14*). Alleles inherited from  
32 NF54 (*chr. 2* and *14*) and from NHP4026 (*chr. 13*) were positively selected in AlbuMAX, while  
33 the same alleles were selected against in serum. Selection driving differential growth was strong  
34 ( $s = 0.10 - 0.23$  per 48-hour lifecycle) and observed in all biological replicates. These results  
35 demonstrate the effectiveness of bulk segregant approaches for revealing nutritional  
36 polymorphisms in *Plasmodium falciparum*. This approach will allow systematic dissection of  
37 nutrient acquisition/metabolism pathways that are potential targets for intervention against *P.*  
38 *falciparum*.

39

## 40 Introduction

41 Nutrient acquisition and metabolism pathways are promising targets for antimalarial  
42 development. Among existing drugs, artemisinin - the frontline drug against malaria - is activated  
43 by hemoglobin digestion (1), while chloroquine interferes with haem polymerization into non-  
44 toxic haemozoin (2), and antifolate drugs (pyrimethamine and sulfadoxine) are competitive  
45 inhibitors that interrupt the folate biosynthesis pathway (3). The mutations conferring resistance  
46 to these drugs are also involved with parasite nutrition transport/metabolism pathways. For  
47 example, resistance to artemisinin (ART), is mediated by mutations in *ketchl3*, which is required  
48 for hemoglobin endocytosis (1). Mutations in the chloroquine resistance transporter (*pfCRT*),  
49 which normally functions as a transport channel for ions and peptides (2) mediate resistance to a  
50 variety of drugs including chloroquine (CQ) and piperazine. Mutations in dihydrofolate reductase  
51 and dihydropteroate synthase, components of the folate synthesis pathway (3) confer resistance to  
52 pyrimethamine and sulfadoxine. Given the importance of nutrient acquisition/metabolism,  
53 effective methods for locating genes and pathways involved in these processes are urgently needed.

54 Exploiting natural variation in parasite nutrient acquisition and metabolism pathways  
55 provides one promising approach. Nguitragool *et al.* used a *P. falciparum* genetic crosses  
56 conducted in chimpanzee hosts to identify an important channel (plasmodial surface anion channel,  
57 PSAC) involved in ion transport (4). Similarly, Wang *et al.* have used a comparable linkage  
58 mapping approach to investigate the ability of parasites to utilize exogenous folate (5) as this is  
59 important for determining the success of drugs that target the parasite folate synthesis pathway.  
60 These key discoveries demonstrate how differences in metabolism or nutrient acquisition between  
61 parasites can be effectively exploited to better understand the genetic underpinning of metabolic  
62 pathways and transport systems, which in turn can highlight potential targets for intervention.  
63 However, traditional linkage mapping is laborious and expensive because individual parasite  
64 progeny must be cloned, phenotyped and sequenced.

65 Continuous *in vitro* culture of asexual erythrocytic stages of the malaria parasite *P. falciparum*  
66 requires human erythrocytes, buffered RPMI 1640 medium and human serum, with a low oxygen  
67 atmosphere at 37°C (6). RPMI 1640 medium is the main resource for sugar (glucose), salts,  
68 essential amino acids and multiple vitamins (7). Human hemoglobin can supply amino acids other

69 than isoleucine (8), while human serum provides all the other nutrients needed for parasite growth,  
70 such as inorganic and organic cations. Lipid-enriched bovine albumin (AlbuMAX) is the most  
71 widely used human serum substitute. Human serum typically contains more phospholipid and  
72 cholesterol, and less fatty acid than AlbuMAX (9). AlbuMAX has several advantages over human  
73 serum for culture of *P. falciparum*, due to its low cost, compatibility with any blood type, and  
74 lower batch-to-batch variation. AlbuMAX supplemented culture medium has made significant  
75 contributions to malaria research, facilitating *in vitro* drug sensitivity assays for screening and  
76 monitoring of antimalarial drugs, parasite growth competition assays to measure fitness costs, and  
77 research on parasite molecular biology and immunology. However, several studies have found that  
78 parasite growth rate differs between AlbuMAX- and human serum-based cultures and can impact  
79 drug susceptibility. For example, AlbuMAX supported parasite growth less well than human serum  
80 for clinical isolates from Cameroonian patients (10), and for long-term lab culture adapted  
81 parasites (11). Furthermore, the 50% inhibitory concentrations (IC<sub>50</sub>s) of multiple antimalarial  
82 drugs obtained with AlbuMAX, including CQ, amodiaquine, quinine and artemisinin, were almost  
83 twice the corresponding values obtained with human non-immune serum (12).

84 Our central aim was to evaluate the efficacy of genetic crosses and a rapid linkage mapping  
85 method - bulk segregant analysis (BSA) - for understanding the genetic basis of nutrition-related  
86 phenotypes in *P. falciparum* using differential growth and fitness in serum- or AlbuMAX-based  
87 *in vitro* culture as a test system. Carrying out genetic crosses in *Anopheles* mosquitoes and human  
88 hepatocyte-liver chimeric mice (FRG huHep mice) (13) now allows us to routinely generate large  
89 pools of recombinant *P. falciparum* progeny (**Fig. 1A**) without the need for chimpanzee hosts. The  
90 FRG huHep mouse supports liver stage development of *P. falciparum* and the transition to asexual  
91 blood stage. We have previously generated four independent *P. falciparum* genetic crosses with  
92 large numbers of unique recombinant progeny using this approach (13-15).

93 BSA provides a simple and fast approach to identify loci that contribute to complex traits (16)  
94 that typically identified using traditional QTL mapping. Using pooled sequencing of progeny  
95 populations, BSA measures changes in allele frequency following application of different selection  
96 pressures (here asexual blood stage growth in serum or AlbuMAX, **Fig. 1B**). BSA, also referred  
97 to as linkage group selection (LGS), has been extensively used for genetic crosses of rodent malaria  
98 parasites to map genes determining blood stage multiplication rate, virulence and immunity in

99 *Plasmodium yoelii*, mutations conferring ART resistance and strain-specific immunity in  
100 *Plasmodium chabaudi* (reviewed in (17)).

101 In this study, we generated replicated genetic crosses between a long-term lab adapted parasite  
102 (NF54, Africa) and a newly cloned clinical parasite (NHP4026, Southeast Asia). We measured  
103 changes of allele frequency in independent progeny populations during parallel asexual blood  
104 stage growth with serum and AlbuMAX. We detected three repeatable quantitative trait loci (QTLs)  
105 regions, on chromosomes 2, 13 and 14, that were associated with parasite growth rates in the  
106 different culture media.

107

## 108 **Results**

### 109 **Genetic crosses and segregant pools**

110 We generated the crosses using *Anopheles stephensi* mosquitoes and FRG huHep mice as  
111 described in Vaughan *et al* (13) and Li *et al* (15). *P. falciparum* parasites NF54 and NHP4026 were  
112 cloned by limiting dilution and used as parents for this cross. NF54 is a parasite of Africa origin  
113 that has been maintained in the lab for decades, in a variety of conditions that not limited to  
114 different serum/AlbuMAX, human erythrocytes and laboratories. NHP4026 was isolated from a  
115 patient visiting the Shoklo Malaria Research Unit (SMRU) clinic on the Thailand-Myanmar border,  
116 2007. NHP4026 has only been cultured in the lab with AlbuMAX for a limited period of time (in  
117 total of 80 days). There are total of 13,195 single-nucleotide polymorphisms (SNPs, approximately  
118 1 SNP per 1.6 kb, **Table S1**) between the two parental parasites within the 21 Mb core genome  
119 (see supplementary Materials and Methods for details).

120 To generate parallel recombinant pools, we mixed gametocyte from both parents at ~1:1 ratio  
121 to infect ~450 mosquitoes (three separate cages). Recombinants are generated after gametes fuse  
122 to form zygotes in the mosquito midgut (**Fig. 1A**). Replication of the four meiotic products  
123 ultimately leads to the generation of thousands of haploid sporozoites within each oocyst. For this  
124 cross, the oocyst prevalence was 93% (range: 86-100%), with an average burden of 14 oocysts per  
125 mosquito midgut (range: 2-61), giving an estimate of 56 (14×4) recombinant genotypes per  
126 infected mosquito. We generated three independent recombinant pools from this experiment. To  
127 ensure that recombinants from each pool are independent, we injected pooled sporozoites into each

128 of three FRG huHep mice from a different cage of mosquitoes (~100). This gave us ~5600 ( $56 \times$   
129 ~100) unique recombinants per pool. The allele frequencies of NF54 in recombinant pools of  
130 parasites emerging from the liver were  $0.518 \pm 0.001$ ,  $0.503 \pm 0.002$  and  $0.549 \pm 0.002$  for the three  
131 mice. Whole genome sequencing (WGS) data of cloned progeny from a mixture of all pools  
132 revealed low numbers of selfed progeny (2/55) in this cross with very little redundancy among  
133 recombinants (**Table S2**) (see also (14)).

134 We cultured each recombinant pool with O-positive non-immune serum and AlbuMAX for 34  
135 days in parallel, with two technical replicates in each media type for each of the three biological  
136 replicates. We collected samples for BSA every four days and used WGS to analyze all segregant  
137 pools to high ( $191 \pm 40$  read depth) genome coverage (**Fig. 1B**). To pinpoint the loci that determine  
138 parasite fitness in different culture media, we plotted the allele frequencies and calculated  $G'$  value  
139 (see supplementary Materials and Methods for details) to measure the significance of allelic skews  
140 throughout the culture process (**Fig. 2**), and to determine the strength of selection acting on  
141 different genome regions in the two different culture conditions we calculated the selection  
142 coefficient ( $s$ , slope of the linear model between the natural log of the allele ratio [freq (NF54)/freq  
143 (NHP4026)] against time, **Fig. S1**) across the whole genome.

#### 144 **QTLs for differential growth in Serum and AlbuMAX**

145 By comparing allele frequency changes in serum and AlbuMAX culture over 34 days, we  
146 detected three QTLs situated at the beginning of chr. 2, the end of chr. 13 and the first half of chr.  
147 14 (**Fig. 3, Fig. S1**). For each detected QTL ( $G' > 20$ , **Fig. 3**), we calculated 95% confidence  
148 intervals to narrow down the size of the genome regions and thus the list of genes that could be  
149 driving selection (**Fig. 4**). The list of genes inside the QTL regions is summarized in **Table S3**. We  
150 prioritized genes within these genome regions by the following criteria: i) if the gene is expressed  
151 in blood stages (**Table S3**); ii) gene annotations and related metabolic pathways; iii) we also  
152 inspected the SNPs and indels that differentiated the two parents, but not as a determinant factor  
153 as gene function might be altered through epigenetic regulations (**Tables S3 and S4**). Those  
154 deemed most probable candidate genes driving these QTLs are listed in **Table S5**.

155 For the chr. 2 and chr. 13 QTL, the NF54 allele frequency increased over time in AlbuMAX and  
156 decreased in serum. The patterns of divergent selection observed were consistent across all

157 biological and technical replicates (**Fig. S1, Table S6**). We observed  $s = 0.04 \pm 0.01$  in serum and  $s$   
158  $= -0.06 \pm 0.01$  in AlbuMAX for the chr. 2 QTL region;  $s = -0.08 \pm 0.02$  in serum and  $s = 0.15 \pm 0.01$   
159 in AlbuMAX for chr. 13. The two QTL regions (chr. 2 and chr. 13 QTLs) are located at the  
160 beginning of a chromosome. It is difficult to define QTL boundaries to a narrow confidence  
161 interval due to limited recombination and difficulties of sequence alignment in these regions. For  
162 the chr. 2 QTL, we inspected genes located from the beginning of chr. 2 (which has a length of 947  
163 kb) to 220 kb (**Fig. 4**). This region contained 53 genes, 14 were not expressed in blood stage  
164 parasites and were excluded, and 13 of the remaining 39 are high priority candidates. Among these,  
165 the aspartate transaminase gene (*AST*, PF3D7\_0204500, also known as aspartate aminotransferase,  
166 *AspAT*), is a critical enzyme for amino acid metabolism. There were no non-synonymous mutations  
167 in the coding region between *AST* alleles from the two parents, but we found multiple differences  
168 within the 5' UTR and gene expression regulatory regions, which include two SNPs (coding region  
169 (c.)-18C>T and c.-29A>C) and three microsatellites (**Table S4**). The chr. 13 QTL contained 33  
170 genes (23 expressed in blood stage, 8 high priority candidates) and spanned 163 kb at the beginning  
171 of chr. 13. Among the genes in this QTL, we identified the erythrocyte binding antigen-140 (*EBA-*  
172 *I40*, PF3D7\_1301600) inside the first 100 kb of chr. 13. *EBA-140* mediates the *P. falciparum*  
173 erythrocyte invasion by binding to the red blood cell receptor glycoporphin C and initiating  
174 merozoite entry (18). Interestingly, there was one non-synonymous mutation (Leu112Phe)  
175 between NF54 and NHP4026 at the *EBA-I40* gene locus. This SNP is located before the first  
176 Duffy-binding-like (DBL) domain (19) and is common in malaria populations (**Fig. S2**). The gene  
177 expression levels of *EBA-I40* are also variable in parasites from different clinical isolates (20).  
178 The *EBA-I40* allele from NHP4026 was preferentially selected for in AlbuMAX (**Fig. 4**).

179 In the chr. 14.1 QTL region, the NF54 allele frequency did not change over time during growth  
180 in serum, but increased significantly during growth in AlbuMAX (**Fig. 2**). The selection coefficient  
181  $s = 0.02 \pm 0.02$  in serum and  $s = -0.10 \pm 0.03$  in AlbuMAX for chr. 14 (**Fig. 5**). This QTL located  
182 in the first half of chr. 14 (630 kb – 813 kb, numbered 14.1 in **Table S5**, spanned 183 kb and  
183 contained 38 genes. Of these genes, 37 are expressed in blood stage, and 11 are high priority  
184 candidates (**Table S5**). Interestingly, NHP4026 carried a single amino acid deletion (Asn226del)  
185 and three non-synonymous mutations (Ser329Pro, Asn503Lys and Val556Ile) in the cysteine  
186 protease *autophagy-related 4* gene (*ATG4*, PF3D7\_1417300).

## 187 Systematic Skews observed in both Serum and AlbuMAX

188 We observed three genome regions that showed strong distortions in allele frequency in each  
189 independent replicate cross in both human serum and AlbuMAX cultures (**Fig. 2A**), consistent  
190 with our earlier report (14, 15). We used  $G'$  values to measure the significance of these allelic  
191 skews (**Fig. 3**) and identified three QTLs with  $G' > 20$ : on chr. 7, in the middle of chr. 12 and on  
192 the second half of chr. 14. We observed strong selection against NHP4026 alleles on both the chr.  
193 7 and chr. 14 QTL regions ( $s = 0.29 \pm 0.04$  in serum and  $0.26 \pm 0.04$  in AlbuMAX for chr. 7,  $s =$   
194  $0.12 \pm 0.02$  in both serum and AlbuMAX for chr. 14), while NF54 alleles were selected against in  
195 the chr. 12 QTL region, with  $s = 0.30 \pm 0.05$  in serum and  $0.25 \pm 0.06$  in AlbuMAX (**Fig. 5, Fig. S1**).  
196 The skews were consistent among all three biological replicates.

197 The chr. 7 QTL spanned from 340,864 kb to 476,223 kb (135kb) and contained 33 genes  
198 (**Table S3**). The *pfCRT* (PF3D7\_0709000), which is known to carry high fitness cost with CQ  
199 resistant alleles (21), is located at the peak of the chr. 7 QTL (**Fig. 4**). Here, NHP4026 carries the  
200 CQ resistant *pfCRT* allele while NF54 is CQ sensitive (**Table S5**). In both serum and AlbuMAX  
201 cultures, the resistant CQ allele carries extremely high fitness cost ( $s = 0.29 \pm 0.04$  in serum and  $s$   
202  $= 0.26 \pm 0.04$  in AlbuMAX, **Fig. 5, Table S6**), and is evident on day 4 of in vitro culture **Fig. 2 and**  
203 **5**).

204 The QTL on chr. 12 spanned from 1,141 kb to 1,283 kb (142 kb, 32 genes, all expressed in  
205 blood stage, and 9 high priority candidates) and the QTL on chr. 14 (numbered 14.2 in **Table S5**)  
206 spanned from 2,356 kb to 2,485 kb (129 kb, 23 genes, 10 high priority candidates). These same  
207 regions carried high fitness costs in a BSA analysis from an independent genetic cross between  
208 two different parental parasites – ART-S MKK2835 and ART-R NHP1337 (15). The multidrug  
209 resistance-associated protein 2 (*MRP2*, PF3D7\_1229100) and apicoplast ribosomal protein S10  
210 (*ARPS10*, PF3D7\_1460900), are both located inside of the chr. 12 and chr. 14 QTL regions  
211 respectively. There are total of four non-synonymous mutations and six indels within the *MRP2*  
212 locus, and all four parental parasites carry different *MRP2* alleles. Those from NF54 and NHP1337  
213 carried high fitness costs. There were two non-synonymous mutations (Val127Met and Asp128His)  
214 in the *ARPS10* locus (**Table S5**) on chr. 14. *ARPS10* alleles with these two mutations (NHP4026  
215 in this study and NHP1337 in previous study by Li et al. (15)) carry a high fitness cost during *in*



216 *vitro* culture with serum. The Val127Met mutation is one of the genetic background SNPs for  
217 *kelch13* alleles on which artemisinin resistance emerged in Cambodia (22).

218

## 219 **Discussion**

### 220 **Locus specific selection between serum and AlbuMAX cultures**

221 We found three QTL regions where allele frequencies of recombinant progeny parasites  
222 showed dramatic divergence, depending on whether they were grown in serum or in AlbuMAX  
223 (Fig. 4). The QTLs for differential selection in serum and AlbuMAX were observed in each of the  
224 recombinant pools and across technical replicates for each pool. Furthermore, selection driving  
225 change in allele frequency in these three QTL regions is strong ( $s = 0.10 \pm 0.01$  [chr. 2],  $s = 0.23 \pm$   
226  $0.02$  [chr. 13] and  $s = 0.12 \pm 0.02$  [chr. 14], Fig. 5, Table S6). AlbuMAX is a lipid-loaded bovine  
227 serum albumin (BSA), while the composition of serum is more complex, containing a variety of  
228 proteins and peptides (albumins, globulins, lipoproteins, enzymes and hormones), nutrients  
229 (carbohydrates, lipids and amino acids), electrolytes, and small organic molecules. Serum also  
230 contains more phospholipid and cholesterol and less fatty acid than AlbuMAX (9). It has been  
231 previously reported that AlbuMAX didn't support malaria parasite growth as well as serum (10-  
232 12). Our analysis suggests there are multiple loci across the genome that determine parasite growth  
233 rate and in serum and AlbuMAX, suggesting that these QTL regions contain genes involved in  
234 nutrient uptake or metabolism. For example, in AlbuMAX, the chr. 2 and 14 QTL regions skew  
235 toward NF54 alleles, while the chr. 13 QTL skews toward the NHP4026 allele. However, in serum  
236 culture the opposite patterns are seen. By inspection of the genes under these QTL peaks, we  
237 identified three genes – *AST* (chr. 2), *EBA-140* (chr. 13) and cysteine protease *ATG4* (chr. 14.1) –  
238 as the strongest candidates (full gene listed in Table S3).

239 Chr. 2: *P. falciparum* acquires nutrients from the host through catabolism of hemoglobin in  
240 RBCs. During this process, plasmodial *AST* plays a critical role in the classical tricarboxylic acid  
241 (TCA) cycle, and also functions to maintain homeostasis of carbohydrate metabolic pathways  
242 (reviewed in (23)). In our study, the *AST* allele from NHP4026 shows lower fitness than the *AST*  
243 allele from NF54 during competitive AlbuMAX culture, and the trend is reversed during serum

244 culture. Furthermore, *AST* is essential (24), which highlights this gene as a potential bottleneck in  
245 energy metabolism and as a target for the design of novel therapeutic strategies. We speculate that  
246 selection acts on the regulation of *AST* gene expression levels: we detected no non-synonymous  
247 mutations in the coding region, but we found multiple variants in the 5' UTR and regulatory  
248 regions (**Table S4**). However, we cannot exclude that other neighboring loci may drive the  
249 observed allele frequency changes.

250 Chr. 13: During the asexual erythrocytic stages, malaria parasites rapidly grow and replicate  
251 every 48 hr resulting in the release of RBC-infectious merozoites. Erythrocyte binding-like (EBL)  
252 ligands which bind to red blood cell receptors, have been identified as major determinants of  
253 erythrocyte invasion by merozoites (reviewed in (25)). To date, four EBL ligands have been  
254 characterized in *P. falciparum*: EBA-175, EBA-181, EBL-1 and EBA-140. In our study, the end  
255 of chr. 13, which contains EBA-140 shows strong skews depending on whether parasites are  
256 cultured in serum or AlbuMAX (**Fig. 2, Fig. 5**). Interestingly, *P. falciparum* infected RBCs show  
257 decreased cytoadherence to multiple cell surface receptors when maintained in AlbuMAX rather  
258 than serum (9) and multiple studies have showed that mutations in *EBA-140* influence parasite  
259 binding to RBC surface receptors (18, 19). In our study, only one amino acid change (Leu112Phe)  
260 distinguished the *EBA-140* from NF54 and NHP4026. We hypothesize that this mutation  
261 influences merozoite binding to the RBC surface.

262 Chr. 14: Cysteine protease *ATG4* is essential for autophagy in both yeast and mammals, as  
263 well as in parasites such as *Leishmania major* and *Trypanosoma cruzi* (reviewed in (26)). A number  
264 of cysteine proteases have been described in malaria parasites with functions including  
265 hemoglobin hydrolysis, erythrocyte rupture, and erythrocyte invasion (27) and two cysteine  
266 proteases (SERA 3 and SERA4) show expression increases >2-fold in AlbuMAX supplemented  
267 media (28). Autophagy involves vesicular trafficking and is important for protein and organelle  
268 degradation during cellular differentiation (29). Conditional knock down of *ATG4* in the  
269 apicomplexan *Toxoplasma* leads to severe growth defects (30). Autophagy can also be triggered  
270 by starvation (29). For example, in response to isoleucine amino acid starvation, *Plasmodium*  
271 parasites enter a quiescent state, and autophagy of parasite proteins could provide a source of  
272 isoleucine in such conditions (31). In our study, the NF54 *ATG4* allele had higher fitness than  
273 NHP4026 during AlbuMAX cultures, while the allele frequencies didn't change in serum (**Fig. 5**).

274 Compared to serum, AlbuMAX contains fewer components (19). We speculate that parasites may  
275 require higher levels of autophagy to compensate for specific nutrients that are missing in  
276 AlbuMAX. Since the *ATG4* allele from NHP4026 differs from NF54 in having one amino acid  
277 deletion and three missense variants we hypothesize that NHP4026 *ATG4* is less able to maintain  
278 high levels of autophagy required for efficient growth in AlbuMAX.

### 279 **Replication of fitness-related QTLs in independent genetic crosses**

280 We detected two additional regions of the genome (chr. 12 and chr. 14.2) that show extreme  
281 skews in allele frequencies in both serum and AlbuMAX cultures. We have previously observed  
282 skews in these two regions during *in vitro* culture of progeny from an independent genetic cross  
283 between parasites MKK2835 and NHP1337 (15). Like NHP4026, MKK2835 and NHP1337 are  
284 newly cloned parasites isolated from patients on the Thailand-Myanmar border (**Table S7**), while  
285 NF54 has been long-term lab adapted. These observations suggest that these skews result from  
286 adaptations to laboratory culture.

287 We observed extremely strong selection against NF54 at the chr. 12 QTL, with selection  
288 coefficients ( $s$ ) of 0.25 per 48 hr asexual cycle in serum and ( $s$ ) of 0.30 per 48 hr asexual cycle in  
289 AlbuMAX (**Fig. 5**). The strong and repeatable selection observed in independent crosses against  
290 the NF54 allele indicates that these skews are not artificial effects of the *in vitro* culture system but  
291 are determined by the parasite genetic background. In both our previous genetic cross using  
292 different parental parasites (15) and in the current study, multidrug resistance-associated protein 2  
293 (MRP2) was located at the peak of the chr. 12 QTL. *MRP2* belongs to the C-family of ATP binding  
294 cassette (ABC) transport proteins that are well known for their role in multidrug resistance. *MRP2*  
295 mediates the export of drugs, toxins, and endogenous and xenobiotic organic anions (32), which  
296 can thus lead to resistance to multiple drugs. *MRP2* may also contribute to the detoxification of  
297 antimalarial drugs. Further experiments are needed to directly determine the function of *MRP2* in  
298 parasite fitness during *in vitro* culture.

299 Mutations in the *Kelch13* gene underlie artemisinin resistance and mutations in the *arps10*  
300 gene provide a permissive genetic background for emergence of artemisinin resistance, but are not  
301 thought to directly contribute to drug resistance (22). We observed selection against the mutant  
302 *arps10* allele at the chr. 14 QTL locus (**Table S7**, NHP4026 and NHP1337) in both this study and

303 our previous cross (15): we measured ( $s$ ) of 0.12 per 48 hr asexual generation using both serum  
304 and AlbuMAX for the cross between NF54 and NHP4026 (this study); and ( $s$ ) of 0.18 per 48 hr  
305 asexual cycle for the cross between MKK2835 and NHP1337 (15). Among the four parental  
306 parasites, only NHP1337 carries the mutant *kelch13* allele (C580Y). Further studies are required  
307 to determine whether the mutant *arps10* allele might compensate for fitness costs associated with  
308 mutant *Kelch13* through epistatic interactions.

### 309 **Fitness costs and compensation at the *PfCRT* locus on chr. 7**

310 We observed strong selection against the *PfCRT* allele (chr. 7 QTL) conferring CQ resistance  
311 (CQR) in both serum and AlbuMAX cultures by comparing the initial allele frequencies and those  
312 after 30 days of culture. This same skew is also observed in clones isolated from our  
313 previous crosses between the same parental parasites (14). The rapid change in allele frequency of  
314 *PfCRT* alleles equates to selection coefficients ( $s$ ) of 0.29 per asexual life cycle in serum and 0.26  
315 in AlbuMAX (Fig. 5A). These fitness cost estimates are strikingly close to those calculated from  
316 laboratory competition experiments that measured fitness costs of *Dd2*-type *PfCRT* allele to be  
317  $\sim 0.3$  per asexual life cycle relative to a wild type *PfCRT* alleles (reviewed in (21)). The long-term  
318 decline in frequency of parasites with CQR *PfCRT* observed in Malawi, Kenya and China  
319 following the withdrawal of CQ use also reveals high fitness costs of CQR *PfCRT* alleles, with  
320 selection coefficients of 0.12 (Malawi), 0.05 (Kenya), and 0.01 (China) per generation (21). These  
321 estimates assuming three parasite generations (from mosquito to mosquito) per year).

322 The prevalence of *PfCRT* CQR alleles is currently  $> 90\%$  in SE Asia (21) and has been  
323 maintained at this level for over 20 years after CQ was abandoned as first-line treatment for *P.*  
324 *falciparum* infections. The reasons for this could include (i) reduced opportunity to compete with  
325 wild type parasites due to the low rate of polyclonal infections, (ii) selection resulting from  
326 treatment of co-infecting *P. vivax* cases with CQ (33), or (iv) the presence of compensatory loci in  
327 the NHP4026 genetic background of CQ resistant parasites. Our data suggest the existence of loci  
328 that may compensate for costly CQR *PfCRT* alleles. Interestingly, NHP4026, the parent carrying  
329 the CQR *PfCRT* allele, shows high competitive fitness in the laboratory, ranking above other SE  
330 Asia clinical isolates (34), and even outcompetes the long-term lab adapted NF54 bearing the CQ  
331 sensitive (CQS) *PfCRT* allele. We speculate that the chr. 12 QTL region (**Fig. 5**, see discussion

332 below), which brings high growth advantage to NHP4026, may compensate for the deleterious  
333 effects of the CQR *PfCRT* to restore parasite fitness.

### 334 **Pros and cons of bulk segregant approaches for genetic analysis**

335 Our study uses a BSA strategy to systemically identify genes involved in competitive nutrient  
336 uptake and metabolism. The highly repeatable results stem from use of independent recombinant  
337 pools and demonstrate the power of the BSA approach. In contrast, conducting these analyses in a  
338 traditional framework, using isolation of individual progeny, measurement of growth phenotypes  
339 of each progeny in different media, and genomic characterization of progeny and parents, as  
340 required for previous nutritional genetics experiments with *P. falciparum* (4, 35, 36) is laborious,  
341 time consuming and expensive. A particular advantage of BSA is that growth phenotypes of all  
342 progeny are determined in a single culture, removing batch effects and experimental variation  
343 resulting from conducting parallel measures with individual progeny clones.

344 BSA is well suited to examine the impact of multiple different nutritional components in  
345 parallel. There are multiple different nutrient components that can be explored using this approach.  
346 For example, we can remove, or reduce concentrations of one nutrient (e.g. glucose, salts, lipid,  
347 amino acids and vitamins) at a time (37-39), and compare progeny populations grown in normal  
348 versus depleted medium, to understand the genetic basis for acquisition and metabolism of specific  
349 nutrients. In this particular experiment, we compared media containing different lipid sources.  
350 However, because human serum and AlbuMAX differ in multiple components, more precisely  
351 constructed media that differ in single lipid components will be needed to identify key nutrients  
352 involved in driving the differential selection. We also note that other aspects of parasite culture are  
353 amenable to genetic dissection using BSA. For example, we can examine selection at different  
354 temperatures, which range from normal to those mimicking fever within infections (40) or we can  
355 examine impacts of pH, which may vary in infected patients due to acidosis (41).

356 However, BSA approaches allow QTL location, but not functional validation of candidate loci.  
357 Furthermore, BSA approaches cannot effectively detect epistatic interactions between loci.  
358 Fortunately, *P. falciparum* can be cloned by dilution, allowing isolation of single progeny. We can  
359 use cloned progeny, with different conformations of alleles from the parents in the QTL regions,  
360 or with CRISPR/Cas9 modifications of candidate loci, to confirm the influences of different alleles

361 on specific parasite metabolic pathways or to examine interactions between loci. In this study, the  
362 chemical differences between serum and AlbuMAX are complex, so it will be difficult to identify  
363 the precise media components driving differential selection. However, we anticipate that  
364 verification of candidate loci determining nutrient metabolism will be possible in future studies,  
365 in which single components of media are varied.

## 366 **Implications for malaria parasite biology and control**

367 Malaria parasites isolated from different regions of the world differ in ease with which they  
368 can be grown in culture using serum and AlbuMAX. For example, several studies suggest that  
369 African parasites grow better in human serum than in AlbuMAX (10), while Thai parasites grow  
370 better in AlbuMAX. We examined the frequencies of the alleles at chr. 2, 13 and 14 QTLs in  
371 worldwide genomic database for *P. falciparum* (MalariaGEN, <https://www.malariagen.net/>, **Fig.**  
372 **S2**). For two (chr. 2: *AST*, chr. 14: *ATG4*) of the three candidate genes, we found large differences  
373 in allele frequency in parasites from Africa and Asia. *AST* (chr. 2) showed minimal variation in  
374 Asia with only one common SNP at frequencies ranging from 0.05 – 0.19, while in Africa there  
375 were five common SNPs with frequencies ranging from 0.14 – 0.40. Similarly, for *ATG* (chr. 14),  
376 one SNP is at a high frequency (0.80 – 0.86) in African locations, and at a low frequency in Asian  
377 populations. Allele frequencies of these loci in global collections are consistent with phenotypic  
378 difference in ability to culture parasites in different culture media, but do not demonstrate any  
379 causative association. Parasites do not encounter AlbuMAX in human infections, but it is possible  
380 that regional difference in human diet and nutrition select for geographical allele frequency  
381 differences observed in the chr. 2, 13 and 14 QTLs. Indeed, there is evidence that indicates that the  
382 nutrient status of host will influence parasite replication and virulence (42).

383 Use of selective markers is widely used for efficient recovery of transfectants. Drug resistance  
384 markers are commonly used for both negative and positive selection of malaria parasites carrying  
385 plasmids (43). However, the selective growth medium technique which is widely used in bacterial  
386 and yeast genetics, has not yet been effectively utilized for parasitic (44) studies. We envisage that  
387 the understanding of key genes underpinning parasite metabolic pathways will allow the  
388 development of novel selection systems for parasite genetic engineering.

389 Essential genes underlying nutrient acquisition or metabolism provide excellent loci for drug  
390 development. Pioneering work on minimal media in *P. falciparum* has demonstrated that  
391 isoleucine alone is required to support *Plasmodium* growth in culture (31), and subsequent work  
392 validated the isoleucine metabolism pathway as a possible target for intervention (45, 46). In this  
393 study we show that BSA provides an additional powerful tool for dissecting the genetic basis of  
394 other nutrient related pathways in *P. falciparum* utilizing natural genetic variation segregating in  
395 crosses.

396

## 397 **Material and Methods**

### 398 **Ethics approval and consent to participate**

399 The study was performed in strict accordance with the recommendations in the Guide for the  
400 Care and Use of Laboratory Animals of the National Institutes of Health (NIH), USA. To this end,  
401 the Seattle Children's Research Institute (SCRI) has an Assurance from the Public Health Service  
402 (PHS) through the Office of Laboratory Animal Welfare (OLAW) for work approved by its  
403 Institutional Animal Care and Use Committee (IACUC). All of the work carried out in this study  
404 was specifically reviewed and approved by the SCRI IACUC.

### 405 **Culture media with serum and AlbuMAX**

406 Contents and manufacturers of the culture media used in this study for *P. falciparum* are as  
407 listed in **Table S8**. In summary, we used RPMI 1640 as basal medium. We added 2 mM L-  
408 glutamine as amino acid supplement, 25mM HEPES for maintaining culture pH and 50  $\mu$ M  
409 hypoxanthine as a nutrient additive which helps in cell growth. To prevent the growth of fungi and  
410 bacteria, we used 50 IU/ml penicillin, 50  $\mu$ g/ml streptomycin and 50  $\mu$ g/ml vancomycin for the  
411 first two asexual life cycles (4 days). The basal medium was supplemented either with 10% O+  
412 human serum or with 0.5 % AlbuMAX II. O+ erythrocytes were added every two days into the  
413 culture media to support amplification of the parasite population. We maintained all the cultures  
414 at 37°C with 5% O<sub>2</sub>, 5% CO<sub>2</sub>, and 90% N<sub>2</sub>, with 2% hematocrit. Only one batch of reagents were  
415 used through the whole experiment.

### 416 **Preparation of genetic cross**

417 We generated the cross using FRG NOD huHep mice with human chimeric livers and *A.*  
418 *stephensi* mosquitoes as described in Vaughan *et al* (13) and Li *et al* (15) (**Fig. 1A**). We used NF54  
419 (lab adapted Africa parasite) and NHP4026 (newly cloned clinical isolate from the Thai-Myanmar  
420 border) in this study. Gametocytes from both the parasite strains were diluted to 0.5%  
421 gametocytemia using human serum erythrocyte mix, to generate infectious blood meals (IBMs).  
422 IBMs from each parent was mixed at equal ratio and fed to ~450 mosquitos (3 cages of 150  
423 mosquitoes, of which ~45 were mosquitoes were sacrificed for prevalence test).

424 We examined the mosquito infection rate and oocyst number per infected mosquito 7 days  
425 post-feeding. Fifteen mosquitoes were randomly picked from each cage and dissected under  
426 microscopy. Sporozoites are isolated from infected mosquito salivary glands and 2-4 Million  
427 sporozoites from each cage of mosquitoes were injected into three FRG huHep mice (one cage per  
428 mouse), intravenously. To allow the liver stage-to-blood stage transition, mice are infused with  
429 human erythrocytes six and seven days after sporozoite injection. Four hours after the second  
430 infusion, the mice are euthanized and exsanguinated to isolate the circulating ring stage *P.*  
431 *falciparum*-infected human erythrocytes. The parasites from each mouse constitute the initial  
432 recombinant pools for further segregation experiment. All initial recombinant pools were  
433 maintained using AlbuMAX culture for 24hr to stabilize the newly transitioned ring stage parasites.  
434 We prepared three recombinant pools in this study.

### 435 **Sample collection and sequencing**

436 We aliquoted each initial recombinant pool into four cultures and maintained two of them with  
437 serum medium and the other two with AlbuMAX medium (**Fig. 1B**). There were total of 12  
438 cultures (3 mice as biological replicates  $\times$  [serum + AlbuMAX II]  $\times$  2 technical replicates). We  
439 maintained all the cultures with standard six-well plate for 45 days. Freshly packed huRBCs were  
440 added every 2 days to each replicate, meanwhile parasites cultures were diluted to 1% parasitemia  
441 to avoid stressing. 70ul packed red blood cells (RBCs) were collected and frozen down every 2-4  
442 days.

443 We extracted and purified genomic DNA using the Qiagen DNA mini kit, and quantified  
444 amounts using Qubit. We constructed next generation sequencing libraries using 50-100 ng DNA  
445 or sWGA product following the KAPA HyperPlus Kit protocol with 3-cycle of PCR. All libraries  
446 were sequenced at 150bp pair-end to a minimum coverage of 100 $\times$  using Illumina Novaseq S4 or  
447 Hiseq X sequencers.



## 448 Bulk segregant analysis

449 We performed the Bulk segregant analysis as described in (15). In short, we first mapped and  
450 genotyped the whole-genome sequencing reads both from parental parasites and progeny pools  
451 against the NF54 genome. To filter out the low-quality genotypes, recalibrated variant quality  
452 scores (VQSR) were calculated by comparing the raw variant distribution with the known and  
453 verified *Plasmodium* variant dataset, and loci with VQSR less than 1 were removed from further  
454 analysis. Only loci with coverage  $> 30\times$  and distinct in two parents were used for further analysis.  
455 Allele frequencies of NF54 were plotted across the genome.  $G'$  values are calculated to detect  
456 extreme-QTLs. Once a QTL was detected ( $G' > 20$ ), we calculated and approximate 95%  
457 confidence interval to localize causative genes. We also calculated selection coefficient ( $s$ ) to  
458 measure the fitness cost at each mutation. See **Supplementary Materials and Methods** for details  
459 in Bulk segregant analysis.

460

## 461 References

- 462 1. J. Birnbaum, S. Scharf, S. Schmidt, E. Jonscher, W. A. M. Hoeijmakers, S. Flemming, C. G. Toenhake, M.  
463 Schmitt, R. Sabitzki, B. J. S. Bergmann, A Kelch13-defined endocytosis pathway mediates artemisinin  
464 resistance in malaria parasites. **367**, 51-59 (2020).
- 465 2. S. H. Shafik, S. A. Cobbold, K. Barkat, S. N. Richards, N. S. Lancaster, M. Llinás, S. J. Hogg, R. L. Summers, M.  
466 J. McConville, R. E. J. N. C. Martin, The natural function of the malaria parasite's chloroquine resistance  
467 transporter. **11**, 1-16 (2020).
- 468 3. A. Gregson, C. V. J. P. r. Plowe, Mechanisms of resistance of malaria parasites to antifolates. **57**, 117-145  
469 (2005).
- 470 4. W. Nguitragool, A. A. Bokhari, A. D. Pillai, K. Rayavara, P. Sharma, B. Turpin, L. Aravind, S. A. Desai, Malaria  
471 parasite clag3 genes determine channel-mediated nutrient uptake by infected red blood cells. *Cell* **145**,  
472 665-677 (2011).
- 473 5. P. Wang, R. K. Brobey, T. Horii, P. F. Sims, J. E. Hyde, Utilization of exogenous folate in the human malaria  
474 parasite *Plasmodium falciparum* and its critical role in antifolate drug synergy. *Molecular microbiology* **32**,  
475 1254-1262 (1999).
- 476 6. W. Trager, J. B. Jensen, Human malaria parasites in continuous culture. *Science* **193**, 673-675 (1976).
- 477 7. G. E. Moore, R. E. Gerner, H. A. J. J. Franklin, Culture of normal human leukocytes. **199**, 519-524 (1967).
- 478 8. I. J. B. o. t. W. H. O. Sherman, Transport of amino acids and nucleic acid precursors in malarial parasites.  
479 **55**, 211 (1977).
- 480 9. S. Frankland, S. R. Elliott, F. Yosaatmadja, J. G. Beeson, S. J. Rogerson, A. Adisa, L. Tilley, Serum lipoproteins  
481 promote efficient presentation of the malaria virulence protein PfEMP1 at the erythrocyte surface.  
482 *Eukaryotic cell* **6**, 1584-1594 (2007).
- 483 10. L. K. Basco, Molecular epidemiology of malaria in cameroon. XX. Experimental studies on various factors of  
484 in vitro drug sensitivity assays using fresh isolates of *Plasmodium falciparum*. *The American Journal of*  
485 *Tropical Medicine and Hygiene* **70**, 474-480 (2004).
- 486 11. C. Dohutia, P. K. Mohapatra, D. R. Bhattacharyya, K. Gogoi, K. Bora, B. K. Goswami, In vitro adaptability of  
487 *Plasmodium falciparum* to different fresh serum alternatives. *Journal of Parasitic Diseases* **41**, 371-374  
488 (2017).

- 489 12. P. Ringwald, F. S. Meche, J. Bickii, L. K. Basco, In Vitro Culture and Drug Sensitivity Assay of Plasmodium  
490 falciparum with Nonserum Substitute and Acute-Phase Sera. *Journal of clinical microbiology* **37**, 700-705  
491 (1999).
- 492 13. A. M. Vaughan, R. S. Pinapati, I. H. Cheeseman, N. Camargo, M. Fishbaugher, L. A. Checkley, S. Nair, C. A.  
493 Hutyra, F. H. Nosten, T. J. Anderson, Plasmodium falciparum genetic crosses in a humanized mouse model.  
494 *Nature methods* **12**, 631 (2015).
- 495 14. K. A. Button-Simons, S. Kumar, N. Carmago, M. T. Haile, C. Jett, L. A. Checkley, S. Y. Kennedy, R. S. Pinapati,  
496 D. A. Shou, M. McDew-White, X. Li, F. H. Nosten, S. H. Kappe, T. J. C. Anderson, J. Romero-Severson, M. T.  
497 Ferdig, S. J. Emrich, A. M. Vaughan, I. H. Cheeseman, Surprising variation in the outcome of two malaria  
498 genetic crosses using humanized mice: implications for genetic mapping and malaria biology. *bioRxiv*,  
499 2019.2012.2013.871830 (2019).
- 500 15. X. Li, S. Kumar, M. McDew-White, M. Haile, I. H. Cheeseman, S. Emrich, K. Button-Simons, F. Nosten, S. H. I.  
501 Kappe, M. T. Ferdig, T. J. C. Anderson, A. M. Vaughan, Genetic mapping of fitness determinants across the  
502 malaria parasite Plasmodium falciparum life cycle. *PLoS Genet* **15**, e1008453 (2019).
- 503 16. I. M. Ehrenreich, N. Torabi, Y. Jia, J. Kent, S. Martis, J. A. Shapiro, D. Gresham, A. A. Caudy, L. Kruglyak,  
504 Dissection of genetically complex traits with extremely large pools of yeast segregants. *Nature* **464**, 1039  
505 (2010).
- 506 17. K. M. Vendrely, S. Kumar, X. Li, A. M. Vaughan, Humanized Mice and the Rebirth of Malaria Genetic  
507 Crosses. *Trends in Parasitology*, (2020).
- 508 18. J. H. Adams, B. Sim, S. A. Dolan, X. Fang, D. C. Kaslow, L. H. Miller, A family of erythrocyte binding proteins  
509 of malaria parasites. *Proceedings of the National Academy of Sciences* **89**, 7085-7089 (1992).
- 510 19. D. H. Lin, B. M. Malpede, J. D. Batchelor, N. H. Tolia, Crystal and solution structures of Plasmodium  
511 falciparum erythrocyte-binding antigen 140 reveal determinants of receptor specificity during erythrocyte  
512 invasion. *Journal of Biological Chemistry* **287**, 36830-36836 (2012).
- 513 20. N. Gomez-Escobar, A. Amambua-Ngwa, M. Walther, J. Okebe, A. Ebonyi, D. J. J. T. J. o. i. d. Conway,  
514 Erythrocyte invasion and merozoite ligand gene expression in severe and mild Plasmodium falciparum  
515 malaria. **201**, 444-452 (2010).
- 516 21. A. Ecker, A. M. Lehane, J. Clain, D. A. Fidock, PfCRT and its role in antimalarial drug resistance. *Trends in*  
517 *parasitology* **28**, 504-514 (2012).
- 518 22. O. Miotto, R. Amato, E. A. Ashley, B. MacInnis, J. Almagro-Garcia, C. Amaratunga, P. Lim, D. Mead, S. O.  
519 Oyola, M. Dhorda, Genetic architecture of artemisinin-resistant Plasmodium falciparum. *Nature genetics*  
520 **47**, 226 (2015).
- 521 23. C. Wrenger, I. B Muller, A. M Silber, R. Jordanova, V. S Lamzin, M. R Groves, Aspartate Aminotransferase-  
522 Bridging Carbohydrate and Energy Metabolism in Plasmodium Falciparum. *Current drug metabolism* **13**,  
523 332-336 (2012).
- 524 24. L.-M. Ting, W. Shi, A. Lewandowicz, V. Singh, A. Mwakwingwe, M. R. Birck, E. A. T. Ringia, G. Bench, D. C.  
525 Madrid, P. C. Tyler, Targeting a novel Plasmodium falciparum purine recycling pathway with specific  
526 immucillins. *Journal of Biological Chemistry* **280**, 9547-9554 (2005).
- 527 25. E. Jaskiewicz, M. Jodłowska, R. Kaczmarek, A. Zerka, Erythrocyte glycoporphins as receptors for Plasmodium  
528 merozoites. *Parasites vectors* **12**, 317 (2019).
- 529 26. J. L. Siqueira-Neto, A. Debnath, L.-I. McCall, J. A. Bernatchez, M. Ndao, S. L. Reed, P. J. J. P. n. t. d.  
530 Rosenthal, Cysteine proteases in protozoan parasites. **12**, e0006512 (2018).
- 531 27. P. J. Rosenthal, Cysteine proteases of malaria parasites. *International journal for parasitology* **34**, 1489-  
532 1499 (2004).
- 533 28. K. Singh, A. Agarwal, S. I. Khan, L. A. Walker, B. L. Tekwani, Growth, drug susceptibility, and gene  
534 expression profiling of Plasmodium falciparum cultured in medium supplemented with human serum.  
535 *Journal of biomolecular screening* **12**, 1109-1114 (2007).
- 536 29. B. Levine, D. J. Klionsky, Development by self-digestion: molecular mechanisms and biological functions of  
537 autophagy. *Developmental cell* **6**, 463-477 (2004).
- 538 30. M. A. Kong-Hap, A. Mouammine, W. Daher, L. Berry, M. Lebrun, J.-F. Dubremetz, S. Besteiro, Regulation of  
539 ATG8 membrane association by ATG4 in the parasitic protist Toxoplasma gondii. *Autophagy* **9**, 1334-1348  
540 (2013).

- 541 31. S. E. Babbitt, L. Altenhofen, S. A. Cobbold, E. S. Istvan, C. Fennell, C. Doerig, M. Llinás, D. E. Goldberg,  
542 Plasmodium falciparum responds to amino acid starvation by entering into a hibernatory state.  
543 *Proceedings of the National Academy of Sciences* **109**, E3278-E3287 (2012).
- 544 32. A. T. Nies, D. Keppler, The apical conjugate efflux pump ABCC2 (MRP2). *Pflügers Archiv-European Journal*  
545 *of Physiology* **453**, 643-659 (2007).
- 546 33. L. S. Ross, S. K. Dhingra, S. Mok, T. Yeo, K. J. Wicht, K. Kümpornsin, S. Takala-Harrison, B. Witkowski, R. M.  
547 Fairhurst, F. Ariey, Emerging Southeast Asian PfCRT mutations confer Plasmodium falciparum resistance to  
548 the first-line antimalarial piperazine. *Nature communications* **9**, 1-13 (2018).
- 549 34. A. R. Tirrell, K. M. Vendrely, L. A. Checkley, S. Z. Davis, M. McDew-White, I. H. Cheeseman, A. M. Vaughan,  
550 F. H. Nosten, T. J. Anderson, M. T. Ferdig, Pairwise growth competitions identify relative fitness  
551 relationships among artemisinin resistant Plasmodium falciparum field isolates. *Malaria journal* **18**, 295  
552 (2019).
- 553 35. A. Gupta, A. A. Bokhari, A. D. Pillai, A. K. Crater, J. Gezelle, G. Saggu, A. S. Nasamu, S. M. Ganesan, J. C.  
554 Niles, S. A. Desai, Complex nutrient channel phenotypes despite Mendelian inheritance in a Plasmodium  
555 falciparum genetic cross. *PLoS pathogens* **16**, e1008363 (2020).
- 556 36. A. Gupta, P. Balabaskaran-Nina, W. Nguiragool, G. S. Saggu, M. A. Schureck, S. A. Desai, CLAG3 self-  
557 associates in malaria parasites and quantitatively determines nutrient uptake channels at the host  
558 membrane. *MBio* **9**, e02293-02217 (2018).
- 559 37. S. A. Desai, Insights gained from P. falciparum cultivation in modified media. *The Scientific World Journal*  
560 **2013**, (2013).
- 561 38. A. A. Divo, T. G. Geary, N. L. Davis, J. B. Jensen, Nutritional requirements of Plasmodium falciparum in  
562 culture. I. Exogenously supplied dialyzable components necessary for continuous growth. *The Journal of*  
563 *protozoology* **32**, 59-64 (1985).
- 564 39. T. G. Geary, A. A. Divo, L. C. Bonanni, J. B. Jensen, Nutritional Requirements of Plasmodium falciparum in  
565 Culture. III. Further Observations on Essential Nutrients and Antimetabolites 1: METABOLISM AND  
566 ANTIMETABOLITES IN P. FALCIPARUM. *The Journal of protozoology* **32**, 608-613 (1985).
- 567 40. M. Gravenor, D. Kwiatkowski, An analysis of the temperature effects of fever on the intra-host population  
568 dynamics of Plasmodium falciparum. *Parasitology* **117**, 97-105 (1998).
- 569 41. K. Plewes, H. W. Kingston, A. Ghose, R. J. Maude, M. T. Herdman, S. J. Leopold, H. Ishioka, M. M. U. Hasan,  
570 M. S. Haider, S. Alam, Cell-free hemoglobin mediated oxidative stress is associated with acute kidney  
571 injury and renal replacement therapy in severe falciparum malaria: an observational study. *BMC infectious*  
572 *diseases* **17**, 313 (2017).
- 573 42. L. Mancio-Silva, K. Slavic, M. T. G. Ruivo, A. R. Grosso, K. K. Modrzynska, I. M. Vera, J. Sales-Dias, A. R.  
574 Gomes, C. R. MacPherson, P. Crozet, Nutrient sensing modulates malaria parasite virulence. *Nature* **547**,  
575 213-216 (2017).
- 576 43. T. Anderson, S. Nkhoma, A. Ecker, D. Fidock, How can we identify parasite genes that underlie antimalarial  
577 drug resistance? *Pharmacogenomics* **12**, 59-85 (2011).
- 578 44. V. Zuzarte-Luis, M. M. Mota, Parasite sensing of host nutrients and environmental cues. *Cell Host Microbe*  
579 **23**, 749-758 (2018).
- 580 45. E. S. Istvan, N. V. Dharia, S. E. Bopp, I. Gluzman, E. A. Winzeler, D. E. Goldberg, Validation of isoleucine  
581 utilization targets in Plasmodium falciparum. *Proceedings of the National Academy of Sciences* **108**, 1627-  
582 1632 (2011).
- 583 46. J. Liu, E. S. Istvan, I. Y. Gluzman, J. Gross, D. E. Goldberg, Plasmodium falciparum ensures its amino acid  
584 supply with multiple acquisition pathways and redundant proteolytic enzyme systems. *Proceedings of the*  
585 *National Academy of Sciences* **103**, 8840-8845 (2006).
- 586 47. A. Miles, Z. Iqbal, P. Vauterin, R. Pearson, S. Campino, M. Theron, K. Gould, D. Mead, E. Drury, J. O'Brien,  
587 Indels, structural variation, and recombination drive genomic diversity in Plasmodium falciparum. *Genome*  
588 *research* **26**, 1288-1299 (2016).
- 589 48. M. McDew-White, X. Li, S. C. Nkhoma, S. Nair, I. Cheeseman, T. J. Anderson, Mode and tempo of  
590 microsatellite length change in a malaria parasite mutation accumulation experiment. *Genome Biology*  
591 *and Evolution* **11**, 1971-1985 (2019).
- 592 49. L. Davies, U. Gather, The identification of multiple outliers. *Journal of the American Statistical Association*  
593 **88**, 782-792 (1993).

- 594 50 B. N. Mansfeld, R. Grumet, QTLseqr: An R package for bulk segregant analysis with next-generation  
595 sequencing. *The Plant Genome* **11**, 180006 (2018).
- 596 51. P. M. Magwene, J. H. Willis, J. K. Kelly, The statistics of bulk segregant analysis using next generation  
597 sequencing. *PLoS computational biology* **7**, e1002255 (2011).
- 598 52. H. Li, A quick method to calculate QTL confidence interval. *Journal of genetics* **90**, 355-360 (2011).
- 599 53. D. Dykhuizen, D. L. Hartl, Selective neutrality of 6PGD allozymes in *E. coli* and the effects of genetic  
600 background. *Genetics* **96**, 801-817 (1980).
- 601 54. E. A. Nadaraya, On estimating regression. *Theory of Probability & Its Applications* **9**, 141-142 (1964).
- 602 55. G. S. Watson, Smooth regression analysis. *Sankhyā: The Indian Journal of Statistics, Series A*, 359-372  
603 (1964).
- 604

## 605 **Acknowledgments**

606 **General:** SMRU is part of the Mahidol Oxford University Research Unit supported by the  
607 Wellcome Trust of Great Britain.

608 **Funding:** This work was supported by National Institutes of Health (NIH) program project grant  
609 P01 AI127338 (to MF), by NIH grant R37 AI048071 (to TJCA) and NIH grant R21 AI133369 (to  
610 AMV). Work at Texas Biomedical Research Institute was conducted in facilities constructed with  
611 support from Research Facilities Improvement Program grant C06 RR013556 from the National  
612 Center for Research Resources.

613 **Author contributions:** S.K., X.L. and T.J.C.A. designed the experiments. S.K., M.T.H, S.Y.K and N.C.  
614 prepared the crosses and collected samples. M.M.W, A.R. and A.S. prepared the genomic DNA libraries.  
615 F.N. provided the parental parasite from Thailand. L.A.C cloned the parental parasites. X.L. performed all  
616 the NGS analysis and data curation. S.K. and X.L. and T.J.C.A. wrote the original manuscript. K.M.V,  
617 K.A.B, I.H.C, S.H.K, F.N., M.T.F and A.M.V reviewed and edited the manuscript.

618 **Competing interests:** The authors declare that they have no competing interests.

619 **Data and materials availability:** All data needed to evaluate the conclusions in the paper are  
620 present in the paper and/or the Supplementary Materials. All raw sequencing data have been  
621 submitted to the NABI Sequence Read Archive (SRA, <https://www.ncbi.nlm.nih.gov/sra>) under  
622 the project number of PRJNA524855. Additional data related to this paper may be requested from  
623 the authors.

624 **Figures**

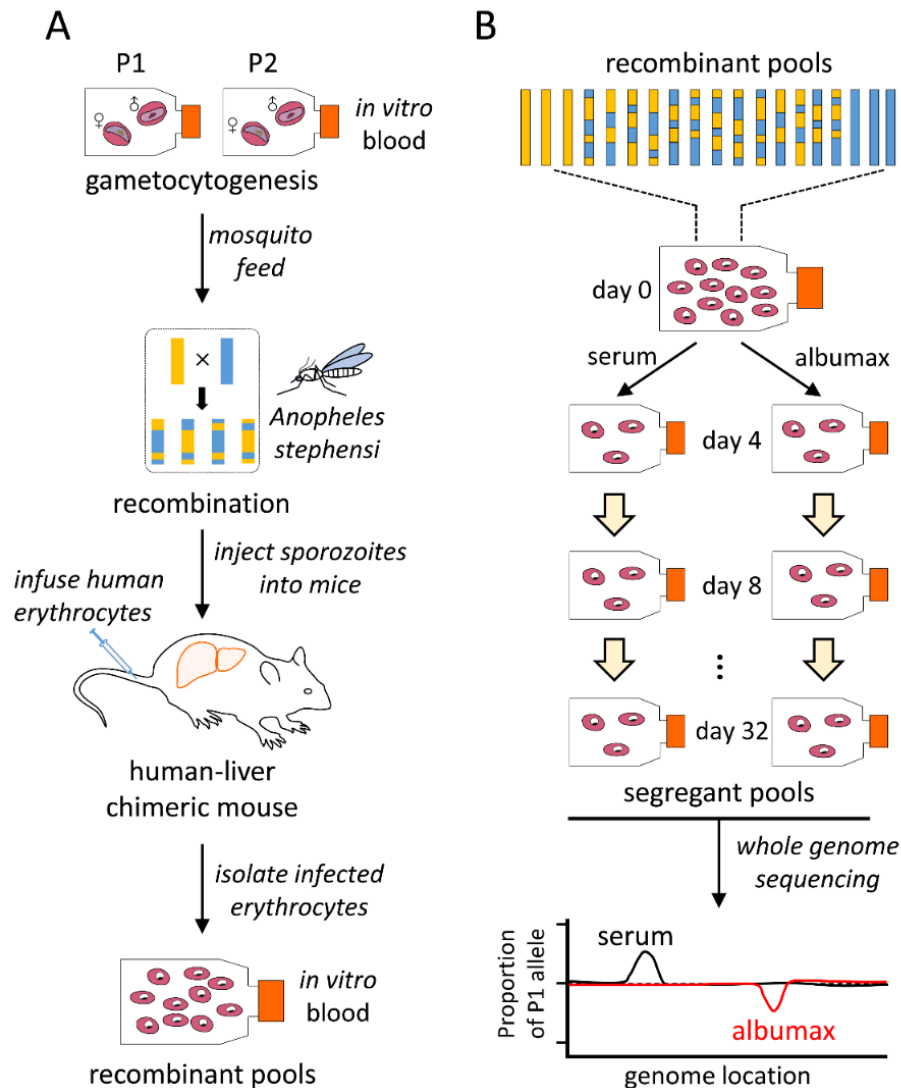

625

626 **Fig. 1. Mapping parasite fitness under different culture conditions.** (A), Recombinant progeny  
627 pool generation. Genetic crosses are generated using female *Anopheles stephensi* mosquitoes and  
628 FRG huHep mice as described by Vaughan et al (13). Recombination of parasite genomes occurs  
629 during meiosis in the mosquito midgut. Recombinant pools are collected from infected mice and  
630 maintained through *in vitro* blood cultures. (B), Bulk segregant analysis. Pools of progeny are  
631 cultured in parallel with serum or AlbuMAX and samples are collected every 4 days. Each  
632 segregant pool is then whole-genome sequenced and genotyped in bulk. Differences in allele  
633 frequency among different groups are used to identify QTLs.

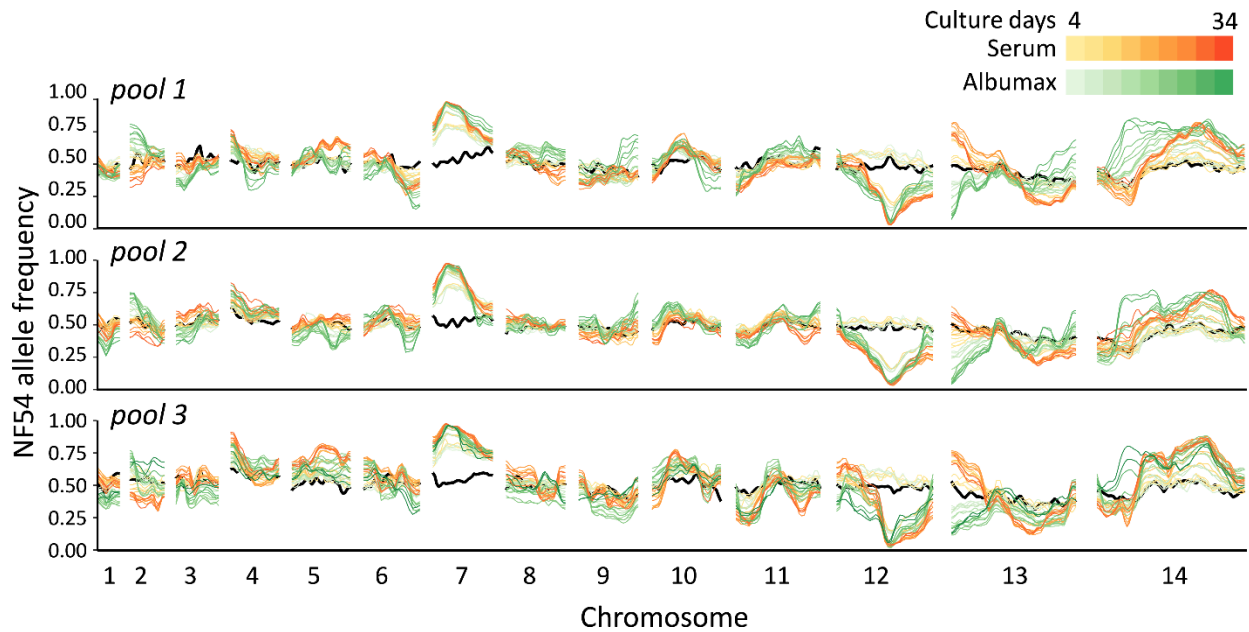

635 **Fig. 2. Change in frequency across the genome in different culture conditions.** The black lines  
636 show allele frequencies from the initial recombinant pools, while red and green lines indicate allele  
637 frequency changes during serum or AlbuMAX cultures. The three plots show allele frequencies  
638 from different recombinant pools (biological replicates). The lines with same color in each panel  
639 show values for the two technical replicates.

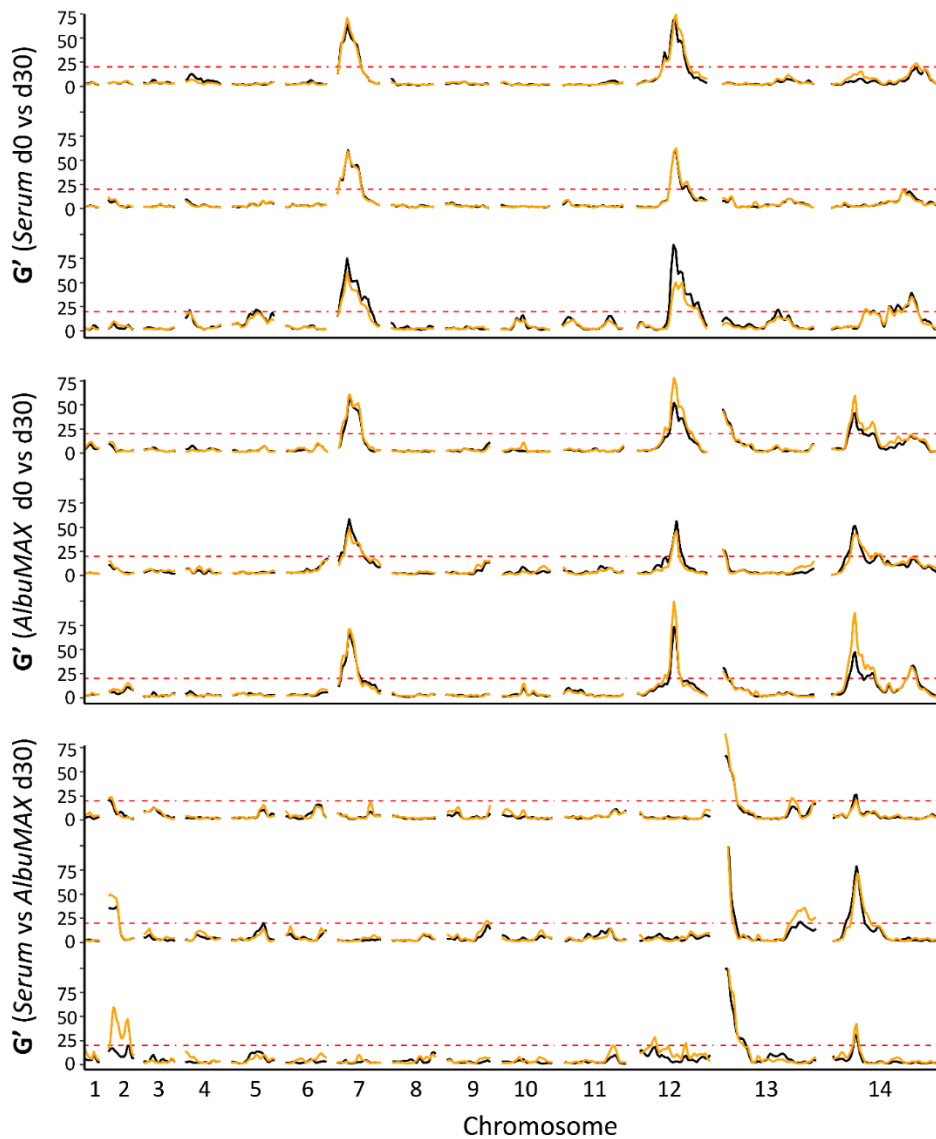

640

641 **Fig. 3. QTLs defined with  $G'$  approach.** The top and middle panels show QTLs detected through  
642 comparing allele frequencies from the initial recombinant pools and pools after 30 days of serum  
643 (top) or AlbuMAX (middle) culture. The bottom panel indicates QTLs at day 30 between serum  
644 and AlbuMAX cultures. There are three plots in each panel, which are from different recombinant  
645 pools (biological replicates). Orange and black lines are technical replicates in each experiment.  
646 We used a threshold ( $G' > 20$ ) to determine significant QTLs.

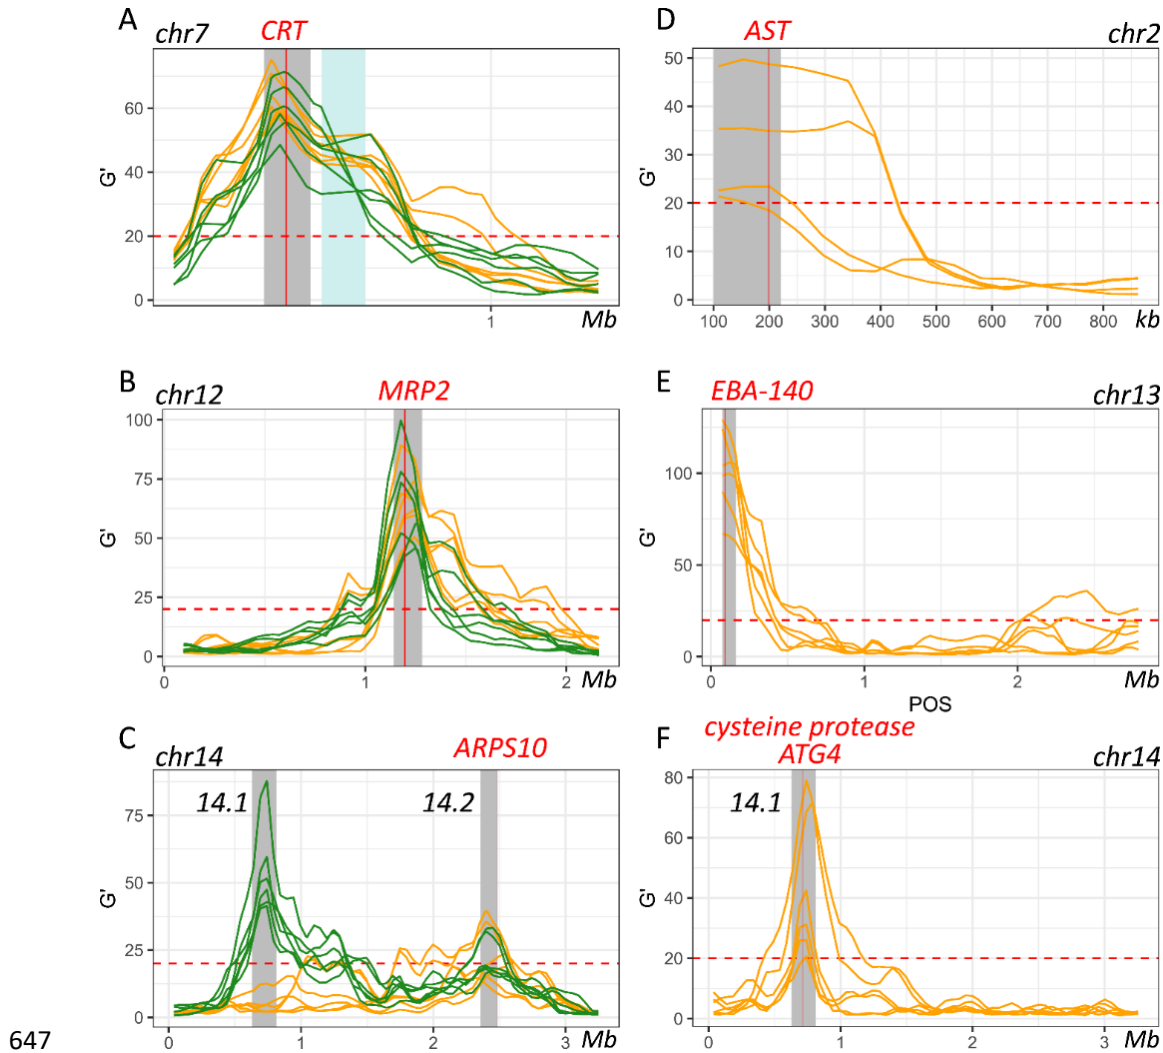

647

648 **Fig. 4. Genes inside QTL regions.** (A, B & C), QTLs detected through comparing allele  
649 frequencies from the initial recombinant pools and pools after 30 days of serum (orange) or  
650 AlbuMAX (green) culture. (D, E & F), QTLs by comparing serum and AlbuMAX after 30 days  
651 of culture. Each line is one comparison. Grey shadows indicate boundaries of the merged 95%  
652 confidential intervals (CIs) of all the QTLs. The light cyan region from chr. 7 is a high variable  
653 genome region in which SNPs could not be called.



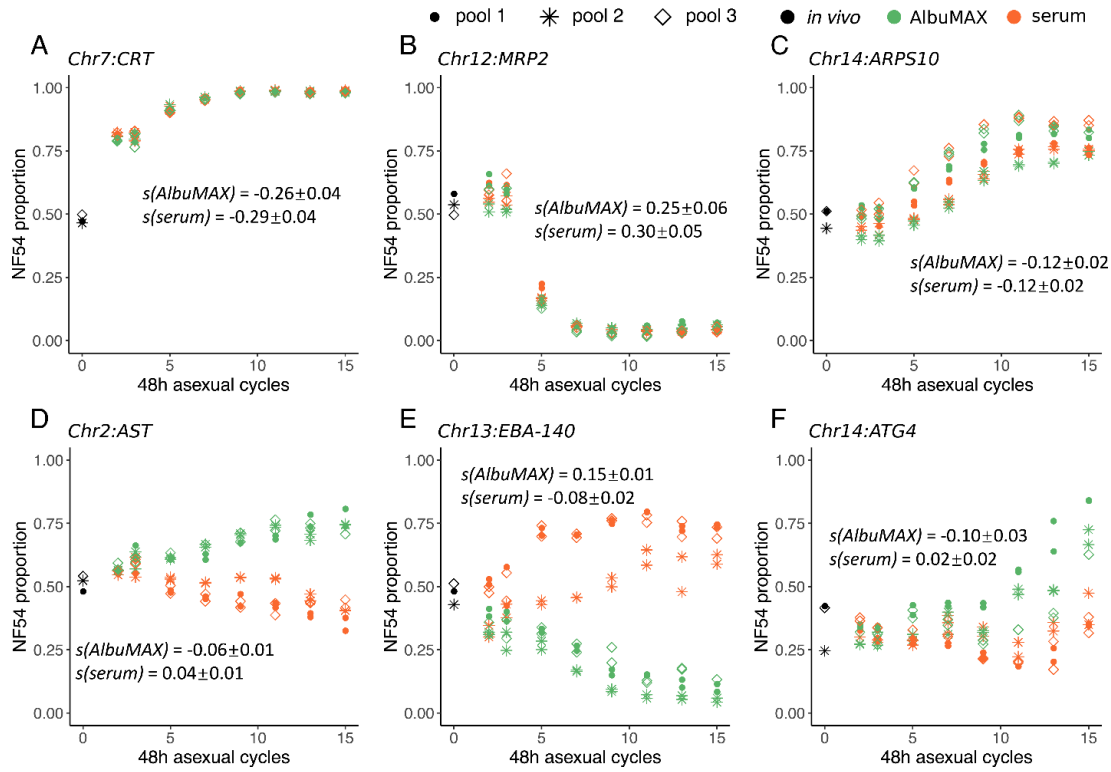

654

655 **Fig. 5. Estimation of selection coefficients from the changes in allele frequencies in candidate**  
656 **gene regions. (A-F), selection coefficients for gene regions of *CRT*, *MRP2*, *ARPS10*, *AST*, *EBA-***  
657 ***10* and *ATG*, separately.**

658

659 **Supplemental Materials**

660 **Supplementary Methods and Materials**

661 **Fig. S1.** Selection coefficients ( $s$ ) across the genome. Estimation of  $s$  was based on the changes of  
662 allele frequency from day1 to day30 of cultures. Positive values of  $s$  indicate a disadvantage for  
663 alleles inherited from NHP4026. Red and green lines indicate cultures by serum and AlbuMAX.

664 **Fig. S2.** NF54 allele frequency at candidate gene regions in world-wide malaria parasite  
665 populations. WAF: west Africa, EAF: east Africa, CAF: central Africa, SAM: south America,  
666 ESEA: east Southeast (SE) Asia, SAS: south Asia, WSEA: west SE Asia, OCE: Pacific Ocean.

667 **Table S1.** SNPs between NF54 and NHP4026 parental parasites.

668 **Table S2.** Summary of cloned progeny from cross between NF54 and NHP4026.

669 **Table S3.** Genes inside the QTL regions.

670 **Table S4.** SNPs and indels inside of the QTL regions.

671 **Table S5.** Top candidate genes located inside of the QTL regions. A full list of genes found within  
672 QTL regions is shown in Table S3.

673 **Table S6.** Summary of selection coefficients ( $s$ ) at candidate gene regions.

674 **Table S7.** Genotypes of parental parasites.

675 **Table S8.** Summary of media components used in this study.

676

## 677 **Supplemental Methods and Materials**

678

### 679 **Genotype calling**

680 We genotyped the parental strains and bulk populations as described in (15). We first generated  
681 a “mock” genome according to the genotype of parent NF54. We mapped the whole-genome  
682 sequencing reads both from parental parasites and progeny against this mock genome using BWA  
683 mem (<http://bio-bwa.sourceforge.net/>) under the default parameters. We excluded the high variable  
684 genome regions (subtelomeric repeats, hypervariable regions and centromeres) and only  
685 performed genotype calling in the 21 Mb core genome (defined in (47)). The resulting alignments  
686 were then converted to SAM format, sorted to BAM format, and deduplicated using picard tools  
687 v2.0.1 (<http://broadinstitute.github.io/picard/>). We used Genome Analysis Toolkit GATK v3.7  
688 (<https://software.broadinstitute.org/gatk/>) to recalibrate the base quality score based on a set of  
689 verified known variants (47). We called variants using HaplotypeCaller and then merged using  
690 GenotypeGVCFs with default parameters except for sample ploidy 1.

691 We only applied filters to the GATK genotypes of parental parasites, using standard filter  
692 methods described by McDew-White et al (48). The recalibrated variant quality scores (VQSR)  
693 were calculated by comparing the raw variant distribution with the known and verified  
694 *Plasmodium* variant dataset, and loci with VQSR less than 1 were removed from further analysis.  
695 After filtration, we selected SNP loci that are distinct in two parents, and only used those for further  
696 bulk segregant analysis.

697

### 698 **Bulk segregant analysis**

699 Only loci with coverage  $> 30\times$  were used for bulk segregant analysis. We counted reads with  
700 genotypes of each parent and calculated allele frequencies at each variable locus. Allele  
701 frequencies of NF54 were plotted across the genome, and outliers were removed following  
702 Hampel’s rule (49) with a window size of 100 loci. We performed the BSA analyses using the R  
703 package QTLseqr (50). Extreme-QTLs were defined as regions with  $G' > 20$  (51). Once a QTL  
704 was detected, we calculated and approximate 95% confidence interval using Li’s method (52) to  
705 localize causative genes. We also measured the fitness cost at each mutation by fitting a linear  
706 model between the natural log of the allele ratio ( $\text{freq}[\text{allele1}]/\text{freq}[\text{allele2}]$ ) against time  
707 (measured in 48hr parasite asexual cycles). The slope provides a measure of the selection

708 coefficient ( $s$ ) driving each mutation (53). The raw  $s$  values were tricube-smoothed with a window  
709 size of 100 kb to remove noise (54, 55).

710

711

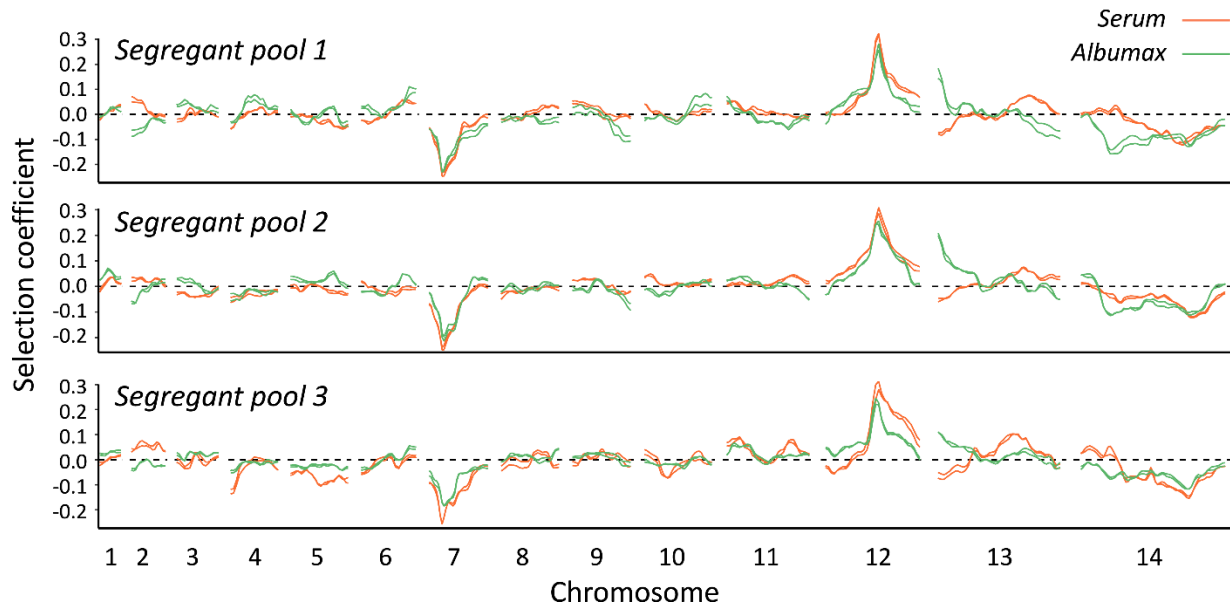

712

713 **Fig. S1.** Selection coefficients ( $s$ ) across the genome. Estimation of  $s$  was based on the changes of  
714 allele frequency from day1 to day30 of cultures. Positive values of  $s$  indicate a disadvantage for  
715 alleles inherited from NHP4026. Red and green lines indicate cultures by serum and AlbuMAX.

716

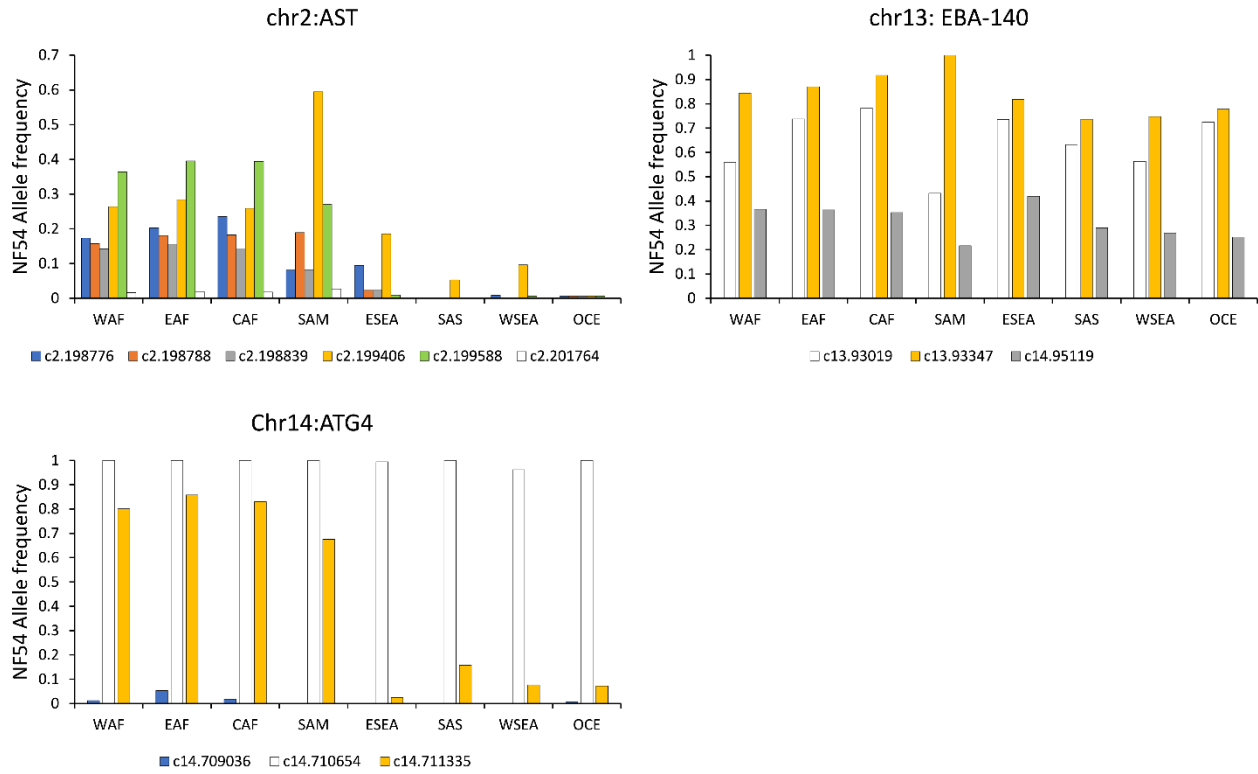

717

718 **Fig. S2.** NF54 allele frequency at candidate gene regions in world-wide malaria parasite  
 719 populations. WAF: west Africa, EAF: east Africa, CAF: central Africa, SAM: south America,  
 720 ESEA: east Southeast (SE) Asia, SAS: south Asia, WSEA: west SE Asia, OCE: Pacific Ocean.
